# Supplementary material for: Integrative RNA- and miRNA-Profile Analysis Reveals a Likely Role of BR and Auxin Signaling in Branch Angle Regulation of B. napus
Source: MDPI journal article supplement (doi:10.3390/ijms18050887), 2017-05-08
Supplement: s1 [file s1]

**Table S1.** Primers used for semi-quantitative RT-PCR

| Gene name     | Forward sequence      | Reverse sequence      |
|---------------|-----------------------|-----------------------|
| BnaA01g35830D | CCTCTTGTAACCCTACCTCG  | GGACAGGTTGATCAACAGCG  |
| BnaA05g14370D | GGTGAGGCGGAGATAACTCA  | TGCCTTCCTTCTCGCATTTTC |
| BnaA06g14090D | TCAATTGAGGTTCTCAGCGG  | GTGCCTTCTTCTCGCATTTTC |
| BnaA08g17390D | TCCTCATGAAGTTACAGGAG  | CGAACACTTGATTCTTCGGT  |
| BnaC04g18710D | TACTCCTGTTACTGCAGATG  | CTTCTGCGTCAGTTTTGGAC  |
| BnaC08g18670D | CAACACATTGTCAGCTGGTT  | AGAACAAGAAGGAGGAGCTT  |
| BnaA02g05070D | TGACTACAGGGTGGAGTGTT  | GGTGCCGCCAAGATTGTTAT  |
| BnaC02g38080D | CTATGATTGATATCCTTGGG  | CCAAATGTTCTCTTCTGAGT  |
| BnaC09g02170D | CGATAGGTTATTGACATCAG  | GGAAACTTCAGAGATTCCTAA |
| BnaC02g02210D | TCTGCCGATGCGGAAATGAA  | TAGCTATCCGCAGAGTCTCA  |
| BnaC02g28720D | AAACCGATCCATTCGCCGTT  | CACTTGACGATGACGTAGAG  |
| BnaA02g23290D | ACAAGAAGCTTTACAGTCATC | CATGACTTAGGTCTAAACTCA |
| BnaC06g39100D | CAACTTCATGAGCCCTTCTT  | TCTCTCCTTCCCAAGCTTTA  |
| BnaC08g36760D | GCTTAAAGCTCTGTGTTCCG  | CCATGGCTTAACTTGGCTGT  |
| BnaA01g25880D | TACGAGATTGTTCTAGCGGG  | CTCAGATACTGCGTACTGAG  |
| BnaA05g19350D | GTGAGCTTGTCCGTGCTACA  | TGAGGCTGGAACCCACCATT  |
| BnaC06g03450D | CAAGAGAAGAGGCCAAGAAG  | CTCGGCATAGGCTGTTTCGA  |
| BnaA06g16880D | CATAGTAGACTCCAACGTCA  | TTCCATCGCAATCTCATCAG  |
| BnaC02g38080D | GACTAGCCCTTTTGATTTCGT | GTGTTTCCAAGAGTTTCTGC  |

|               |                       |                       |
|---------------|-----------------------|-----------------------|
| BnaC09g02170D | CACAACTGATGTCAATAACC  | GAGTTCTTAGAGAAGTTGGA  |
| BnaC02g02210D | TCACCGAATAGATGCGTCAT  | TTCTCATCGTTTAGAGCAGT  |
| BnaC06g39100D | ACTCGTGGTTGCTGAACCA   | TGTGGCTCCTCCAGAGTTT   |
| BnaA01g33420D | TATGGGTTTCAGTTTCTGAAG | TTCTGTTCTTGCACTTTTCC  |
| BnaA06g02010D | CGAAGACGAAGCTGGTTCAT  | CTCATCTTCTCTTGCTTGCC  |
| BnaA06g27950D | CACAACAGCAACATCAATGG  | AAACATGCAACCTCTTCACG  |
| BnaC03g13360D | GGTTCATCTGAATCTTCACG  | GGCCTTGTAAGGTATTGTACG |
| BnaC06g09030D | GAGCCCTCACTCACCTTATT  | TGATCCCAATCATCCAGTCG  |
| BnaC08g43820D | CTGGGATTACCAGGAACAGA  | TACACCAGAGCCTAAACACC  |
| BnaC08g43830D | TCGAGCTGAATCTGAGAGAC  | TCAAGCTCTGCTCTTGCACT  |
| BnaC08g50150D | TTGAGCTGGGGAAGACTAAT  | TCCAATCTCCTTCTTTATCC  |
| BnaCnng41350D | TCGCCAGTGACTGGAACCA   | CTTCAAGCTCGTACTTTTGC  |

**Table S2.** Primers used for stem loop qRT-PCR in miRNA expression analysis

| Primer name | Primer sequence                                    |
|-------------|----------------------------------------------------|
| 319RTR1     | GTCGTATCCAGTGCAGGGTCCGAGGTATTCGCACTGGATACGACAGGGAG |
| 165RTR1     | GTCGTATCCAGTGCAGGGTCCGAGGTATTCGCACTGGATACGACAGGGGG |
| 165RTR2     | GTCGTATCCAGTGCAGGGTCCGAGGTATTCGCACTGGATACGACAAGGGG |
| 156RTR1     | GTCGTATCCAGTGCAGGGTCCGAGGTATTCGCACTGGATACGACGTGCTC |
| 160RTR1     | GTCGTATCCAGTGCAGGGTCCGAGGTATTCGCACTGGATACGACTGGCAT |

|                  |                                                    |
|------------------|----------------------------------------------------|
| 390RTR1          | GTCGTATCCAGTGCAGGGTCCGAGGTATTCGCACTGGATACGACGGCGCT |
| 172RTR1          | GTCGTATCCAGTGCAGGGTCCGAGGTATTCGCACTGGATACGACTGCAGC |
| 156QF1           | AGCAGCCATGACAGAAGAGAGT                             |
| 165QF1           | AGCAGCCATCGGACCAGGCTTC                             |
| 319QF1           | AGTAGTCATTGGACTGAAGGGA                             |
| 160QF1           | AGCAGCCATGCCTGGCTCCCTG                             |
| 390QF1           | GCGGCGGAAAGCTCAGGAGGGA                             |
| 172QF1           | GCGGCGGGAGAATCTTGATGATG                            |
| Universal primer | GTGCAGGGTCCGAGGTATTC                               |
| U6s              | TTGGAACGATACAGAGAAGATTAGCA                         |
| U6a              | TTGGACCATTCTCGATTTGTG                              |

---
